# Supplementary material
Source: PubMed Central journal article supplement (PMC1838507)
Supplement: pnas_0700642104_2.pdf [file pnas_0700642104_2.pdf]

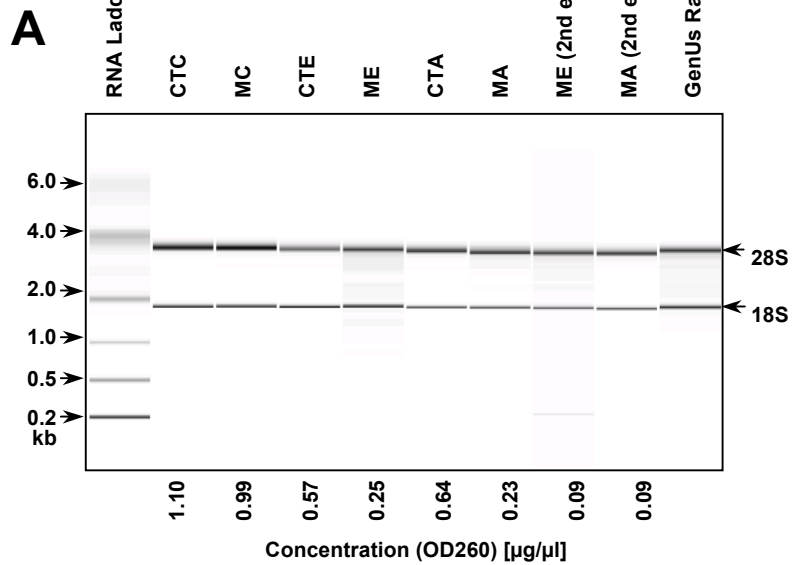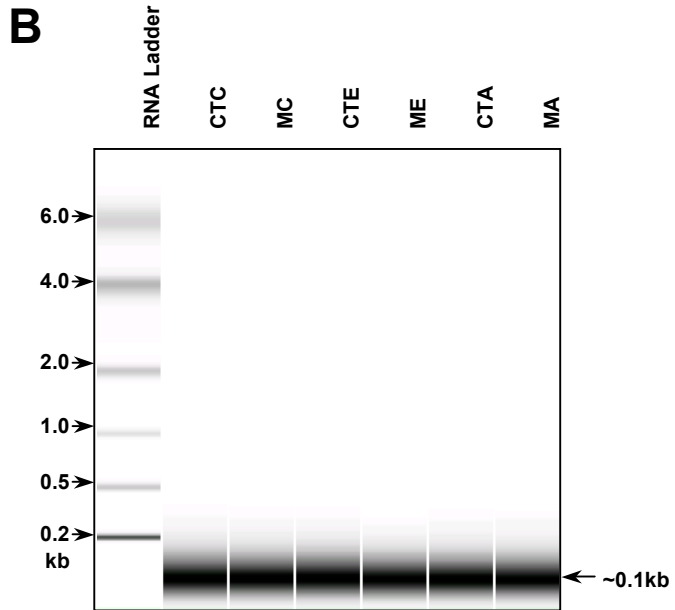

10  $\mu\text{g}$  of fragmented cRNA was hybridized to each array

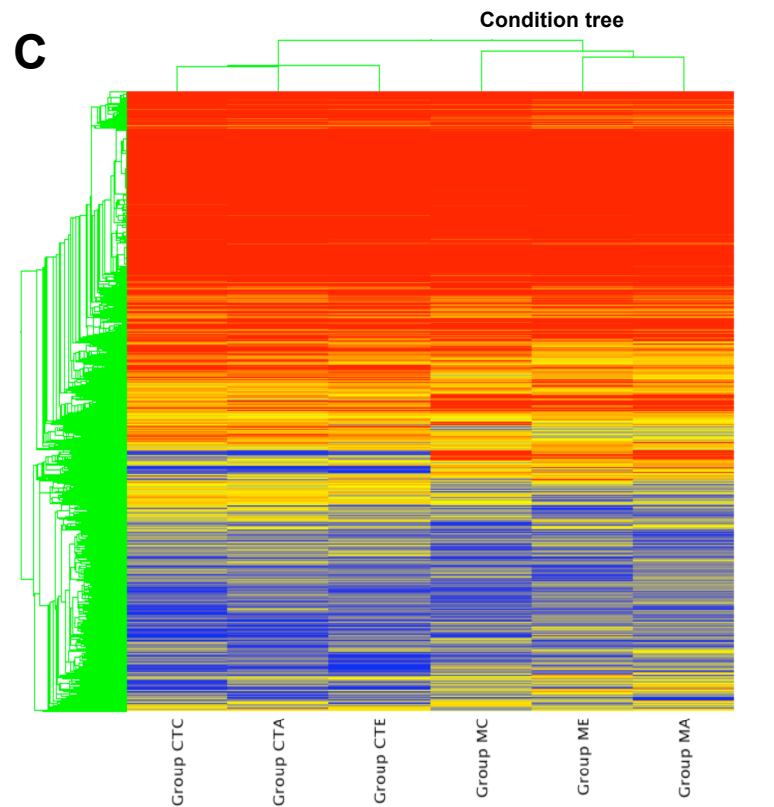

Data was analyzed using GeneSpring Software (Silicon Genetics).  
Genes present on at least 1 array (26,029) are displayed as normalized to the median intensity of the array.  
Red=High expression, Yellow=Medium expression, Blue=Low expression
