# Supplementary material
Source: PubMed Central journal article supplement (PMC1838507)

**A**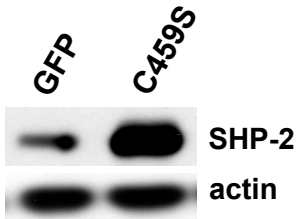**B**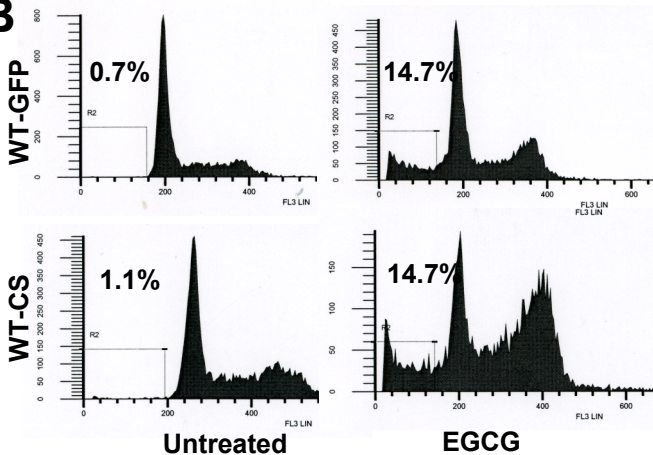

Supplement: pnas_0700642104_1.pdf [file pnas_0700642104_1.pdf]

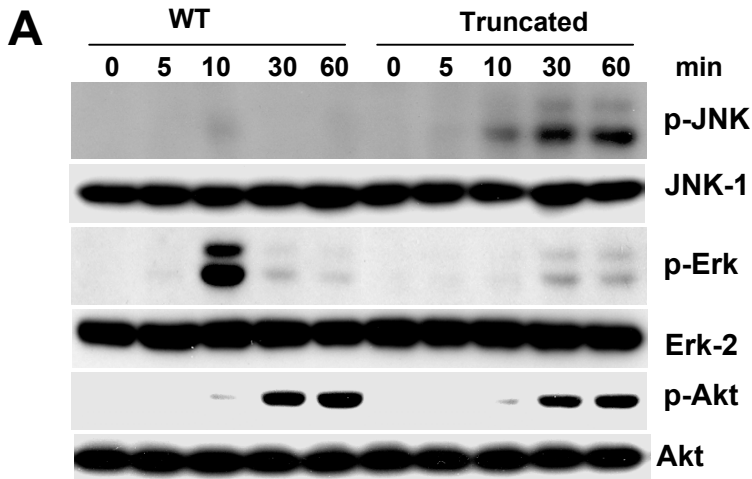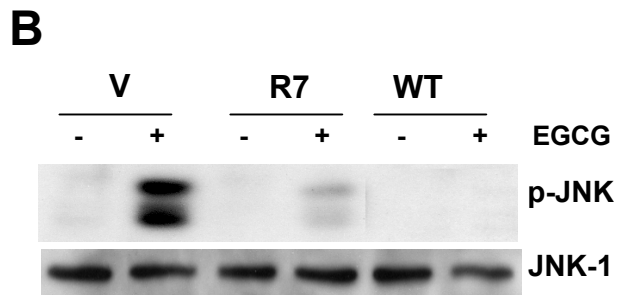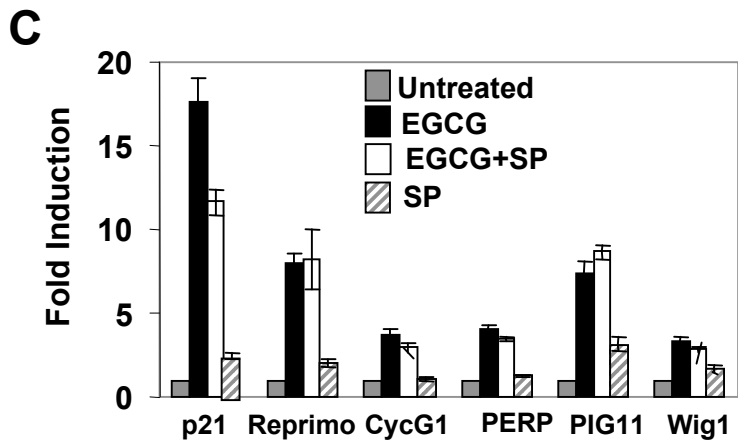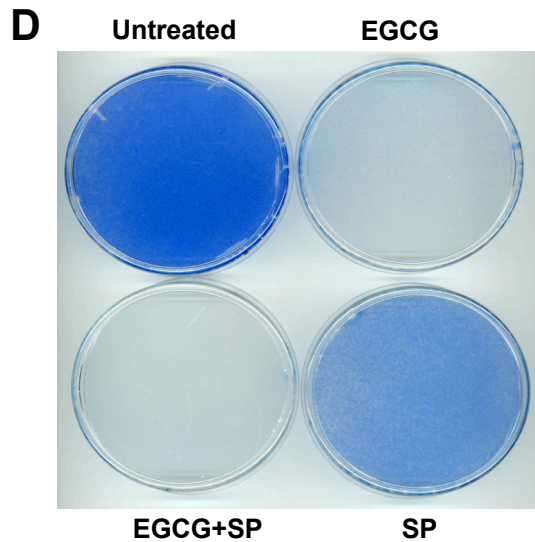

Supplement: pnas_0700642104_3.pdf [file pnas_0700642104_3.pdf]

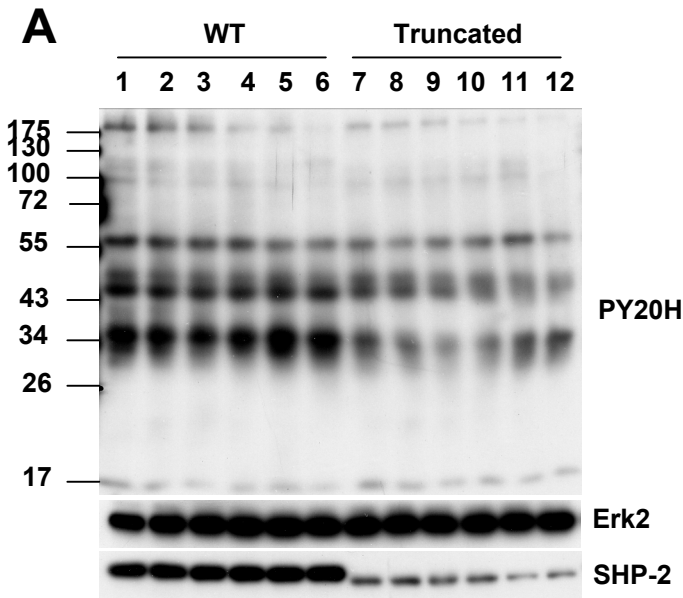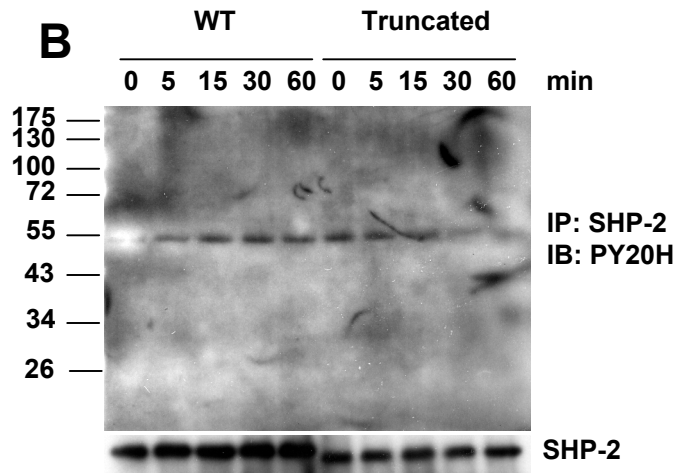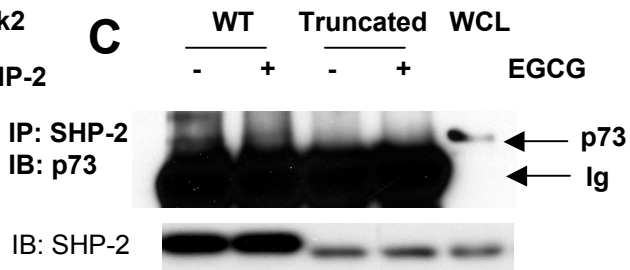

Supplement: pnas_0700642104_4.pdf [file pnas_0700642104_4.pdf]
